# Supplementary material for: A switchable [2]rotaxane with two active alkenyl groups
Source: publisher site journal article supplement (doi:10.3762/bjoc.14.181), 2018-08-08
Supplement: Additional file 1 [file 1860-5397-14-181-S1.pdf]

**Supporting Information**  
**for**  
**A switchable [2]rotaxane with two active alkenyl groups**

Xiu-Li Zheng, Rong-Rong Tao, Rui-Rui Gu, Wen-Zhi Wang, Da-Hui Qu\*

Address: Key Laboratory for Advanced Materials and Institute of Fine  
Chemicals, School of Chemistry and Molecular Engineering, East China  
University of Science and Technology, 130 Meilong Road, Shanghai, 200237,  
China

Email: Da-Hui Qu\* - dahui\_qu@ecust.edu.cn

\*Corresponding author

**$^1\text{H}$ ,  $^{13}\text{C}$  NMR spectra and HRESI mass spectra of compounds  
3, 4, 5, 8 and [2]rotaxane R1**

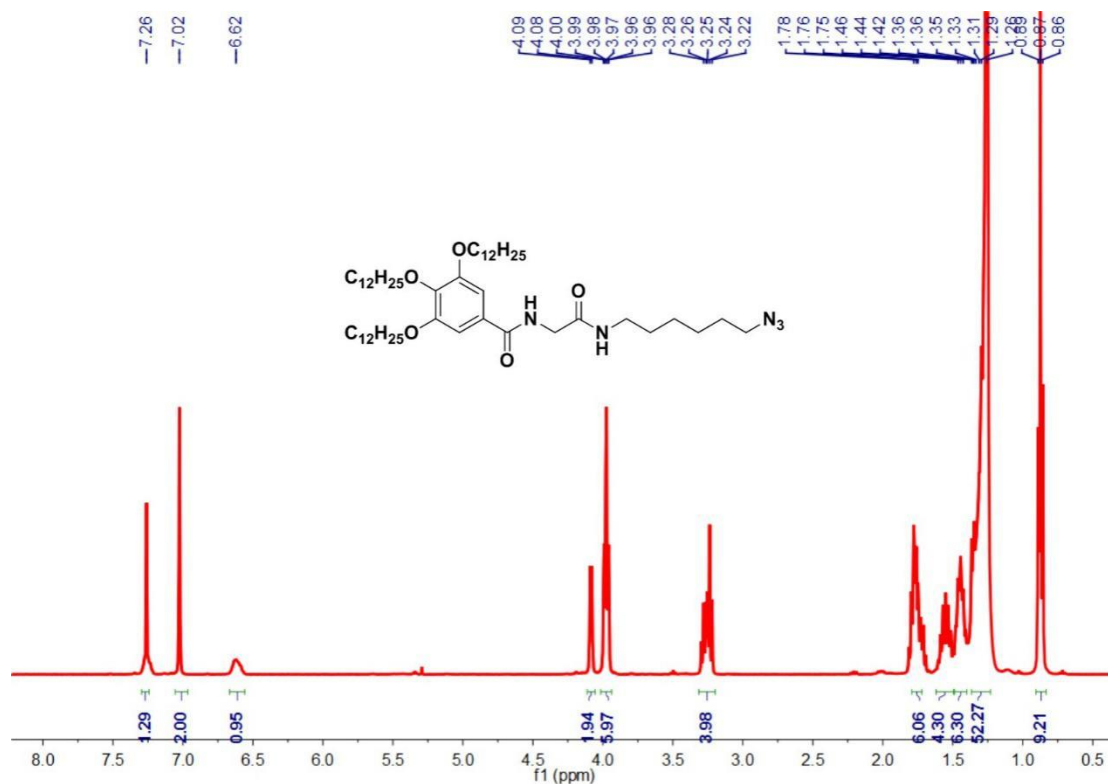

**Figure S1:** <sup>1</sup>H NMR spectrum of compound **8** (400 MHz, CDCl<sub>3</sub>, 298 K).

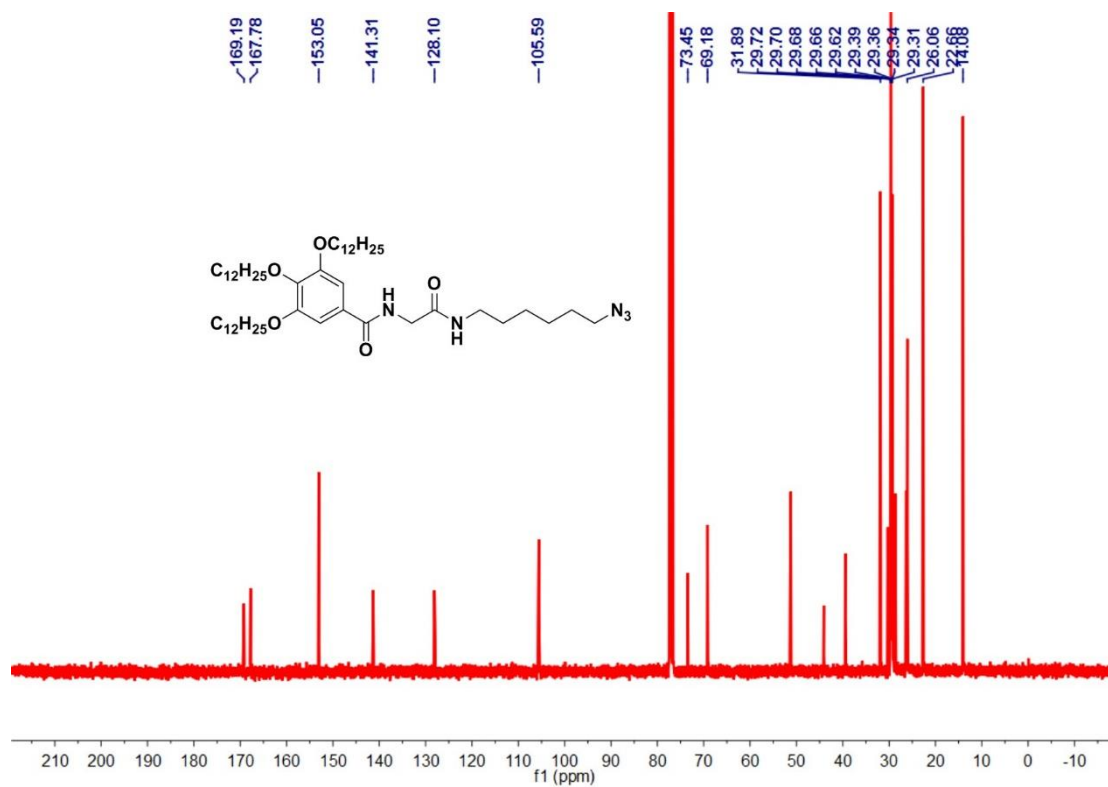

**Figure S2:** <sup>13</sup>C NMR spectrum of compound **8** (100 MHz, CDCl<sub>3</sub>, 298 K).

### Single Mass Analysis

Tolerance = 30.0 PPM / DBE: min = -1.5, max = 100.0

Element prediction: Off

Number of isotope peaks used for i-FIT = 2

Monoisotopic Mass, Even Electron Ions

70 formula(e) evaluated with 1 results within limits (up to 1 best isotopic matches for each mass)

Elements Used:

C: 0-51 H: 0-94 N: 0-5 O: 0-5 K: 0-1

DH-QU

ECUST Institute of Fine Chem

09-Jan-2018

QDH-ZXL-21 172 (2.200) Cm (170-175)

20:22:36

1: TOF MS ES+

8.87e+001

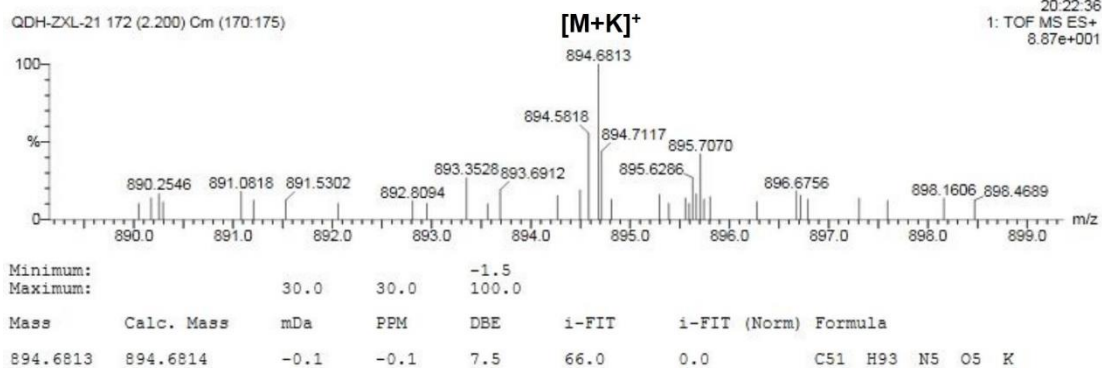

Figure S3: HRESI mass spectrum of compound 8.

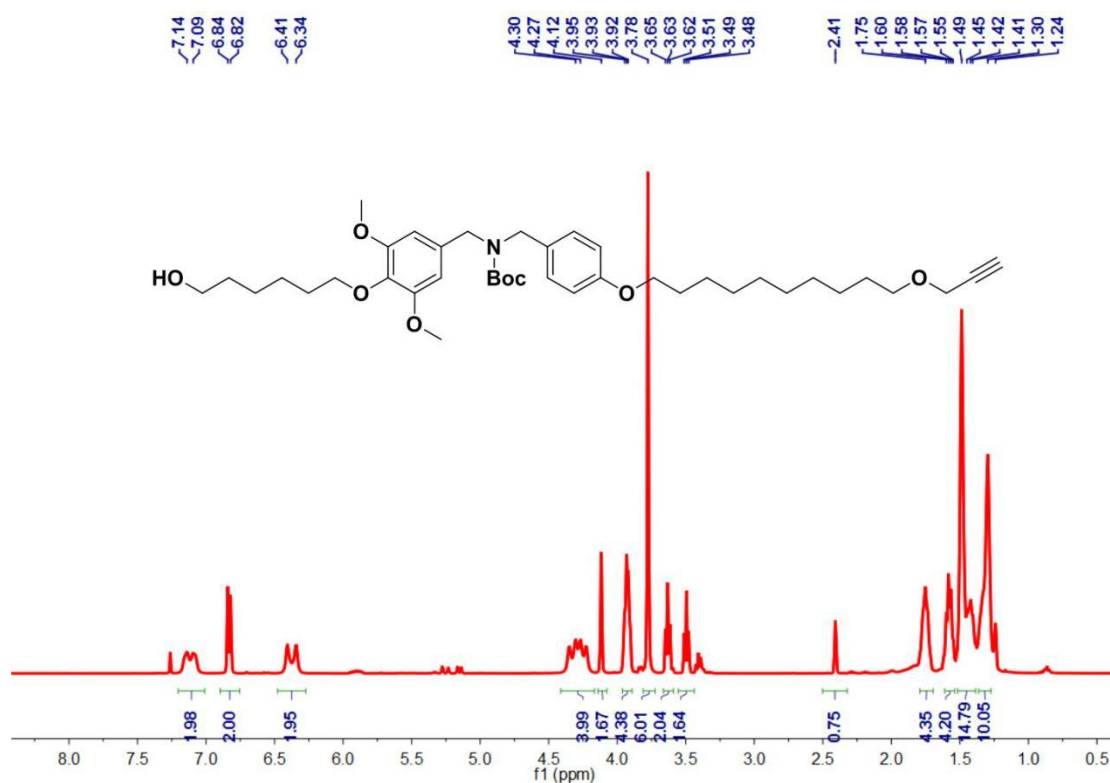

Figure S4:  $^1\text{H}$  NMR spectrum of compound 3 (400 MHz,  $\text{CDCl}_3$ , 298 K).

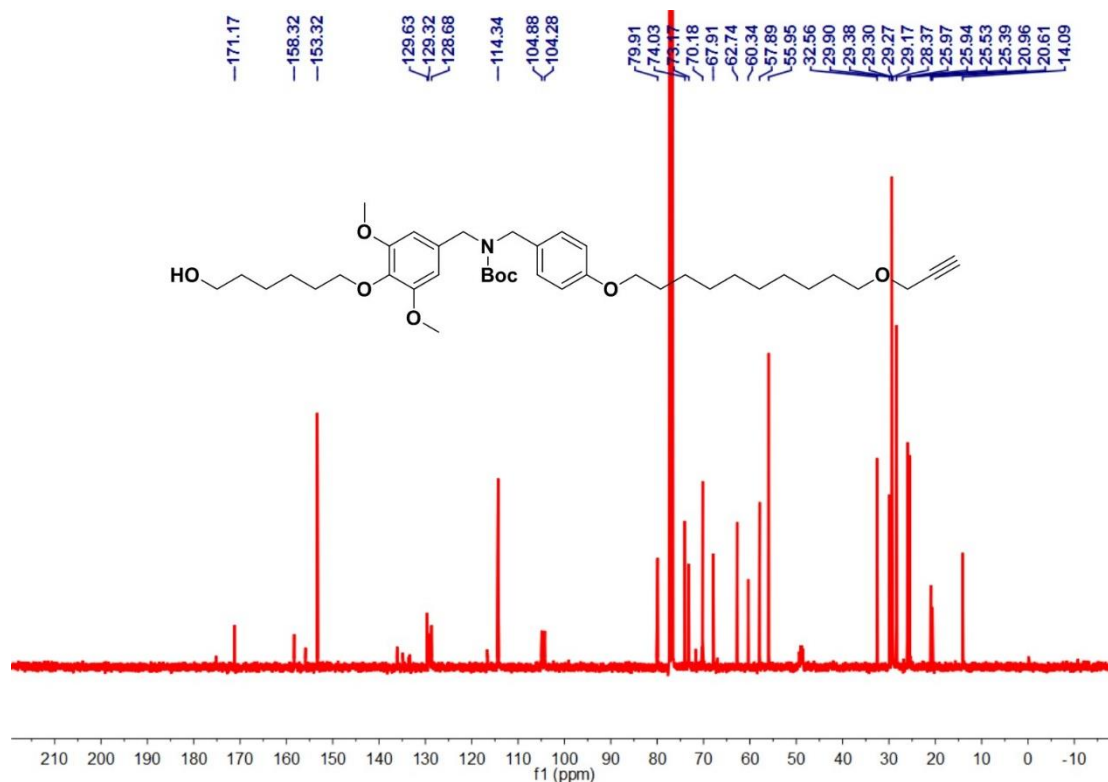

**Figure S5:**  $^{13}\text{C}$  NMR spectrum of compound **3** (100 MHz,  $\text{CDCl}_3$ , 298 K).

#### Single Mass Analysis

Tolerance = 30.0 PPM / DBE: min = -1.5, max = 100.0

Element prediction: Off

Number of isotope peaks used for i-FIT = 2

Monoisotopic Mass, Even Electron Ions

32 formula(e) evaluated with 1 results within limits (up to 1 best isotopic matches for each mass)

Elements Used:

C: 0-40 H: 0-61 N: 0-1 O: 0-8 Na: 0-1

DH-QU

ECUST institute of Fine Chem

10-Jan-2018

19:23:40

1: TOF MS ES+

3.35e+003

QDH-ZXL-22 44 (0.630) Cm (43.48)

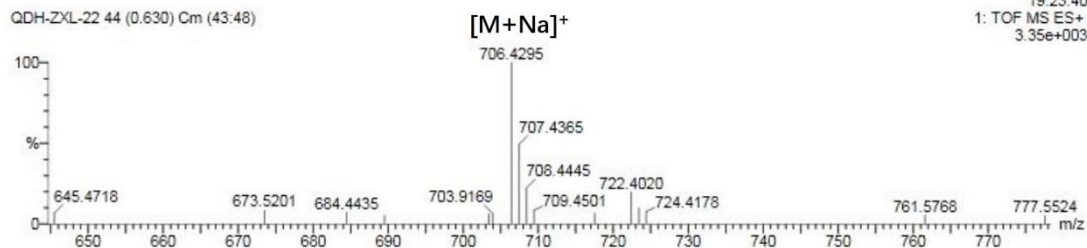

Minimum:

Maximum:

30.0

30.0

-1.5

100.0

| Mass     | Calc. Mass | mDa | PPM | DBE  | i-FIT | i-FIT (Norm) | Formula         |
|----------|------------|-----|-----|------|-------|--------------|-----------------|
| 706.4295 | 706.4295   | 0.0 | 0.0 | 10.5 | 11.4  | 0.0          | C40 H61 N 08 Na |

**Figure S6:** HRESI mass spectrum of compound **3**.

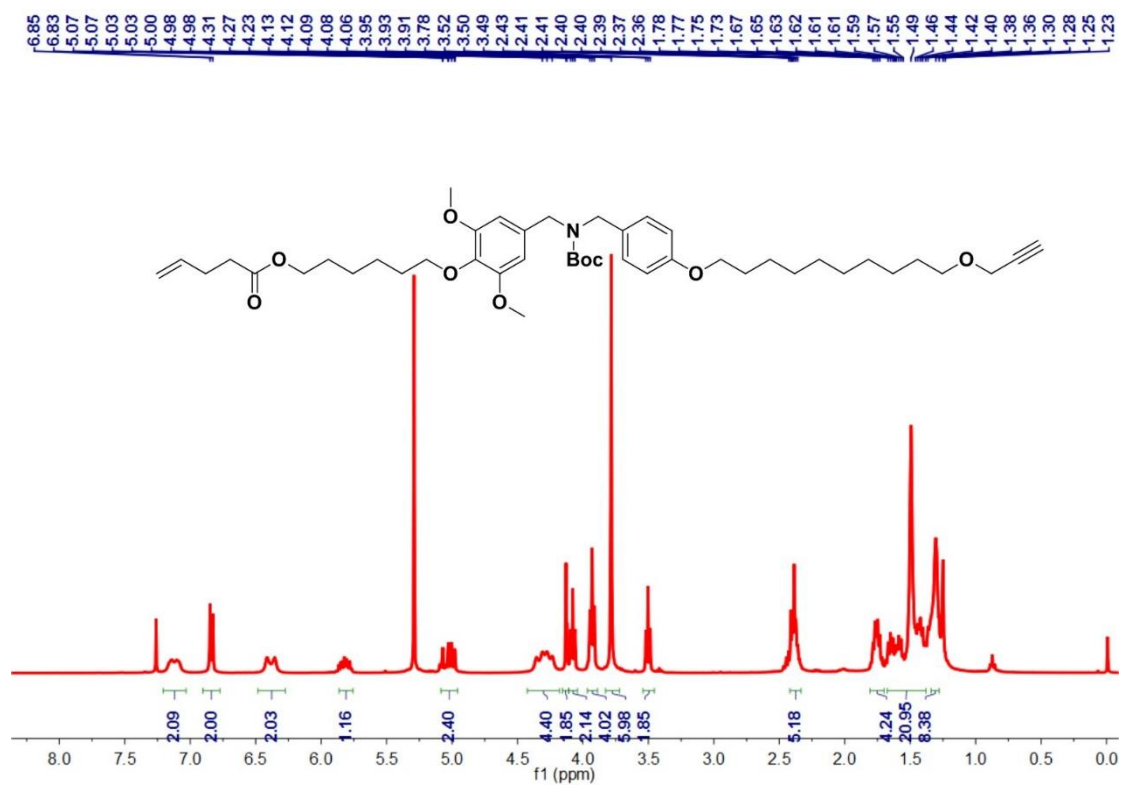

**Figure S7:** <sup>1</sup>H NMR spectrum of compound **4** (400 MHz, CDCl<sub>3</sub>, 298 K).

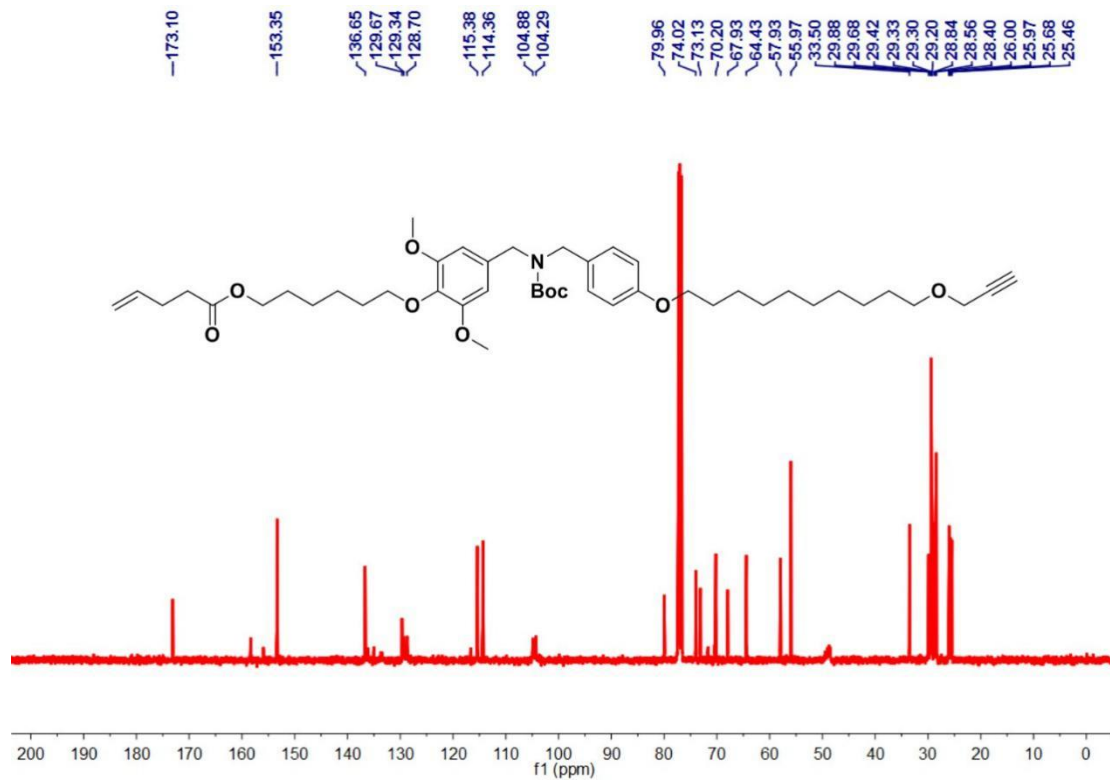

**Figure S8:** <sup>13</sup>C NMR spectrum of compound **4** (100 MHz, CDCl<sub>3</sub>, 298 K).

### Single Mass Analysis

Tolerance = 30.0 PPM / DBE: min = -1.5, max = 100.0

Element prediction: Off

Number of isotope peaks used for i-FIT = 2

Monoisotopic Mass, Even Electron Ions

35 formula(e) evaluated with 1 results within limits (up to 1 best isotopic matches for each mass)

Elements Used:

C: 0-45 H: 0-68 N: 0-1 O: 0-9 Na: 0-1

DH-QU

ECUST Institute of Fine Chem

09-Jan-2016

QDH-ZXL-23 55 (0.775) Cm (55.59)

[M+K]<sup>+</sup>

21:54:19  
1: TOF MS ES+  
5.17e+002

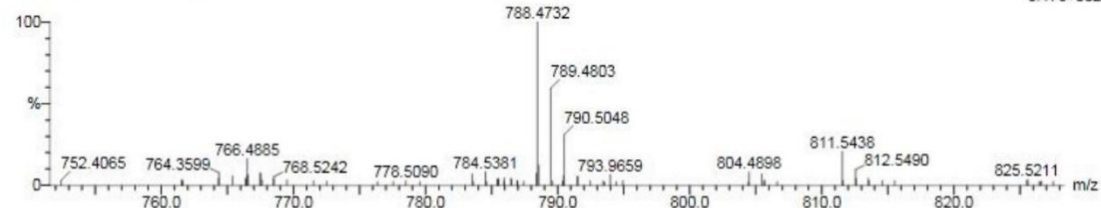

Minimum:

Maximum:

30.0

30.0

-1.5

100.0

| Mass     | Calc. Mass | mDa | PPM | DBE  | i-FIT | i-FIT (Norm) | Formula         |
|----------|------------|-----|-----|------|-------|--------------|-----------------|
| 788.4732 | 788.4714   | 1.8 | 2.3 | 12.5 | 23.0  | 0.0          | C45 H67 N O9 Na |

Figure S9: HRESI mass spectrum of compound 4.

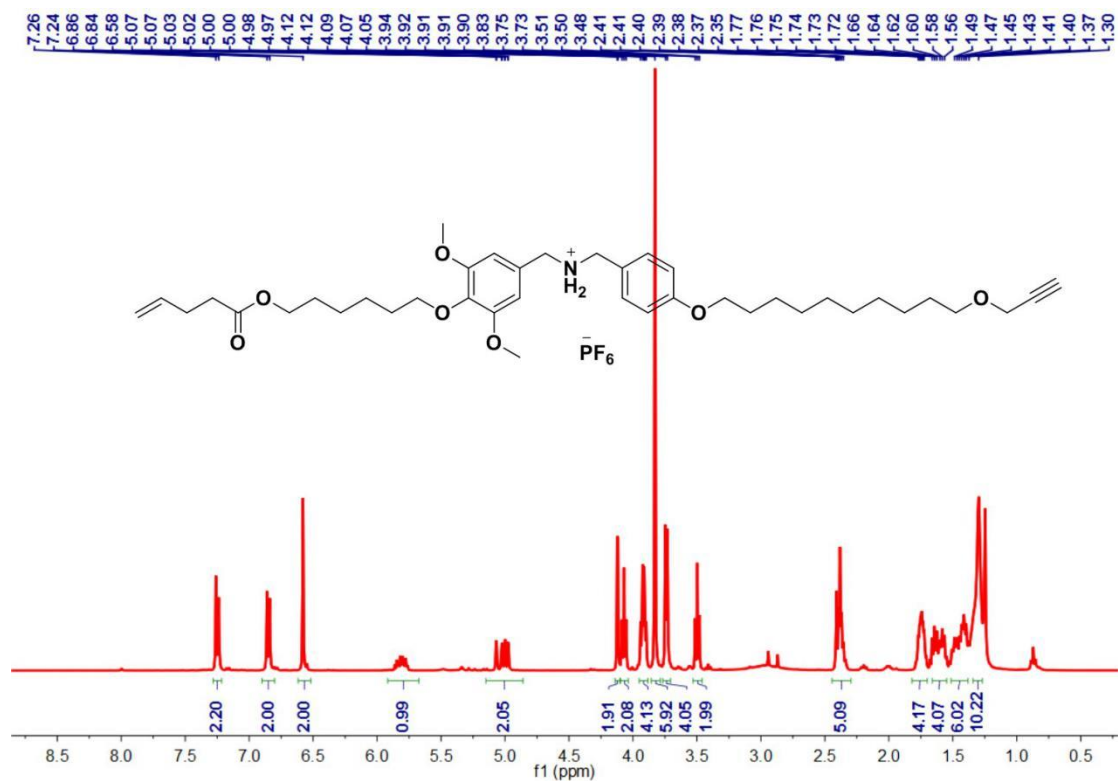

Figure S10: <sup>1</sup>H NMR spectrum of compound 5 (400 MHz, CDCl<sub>3</sub>, 298 K).

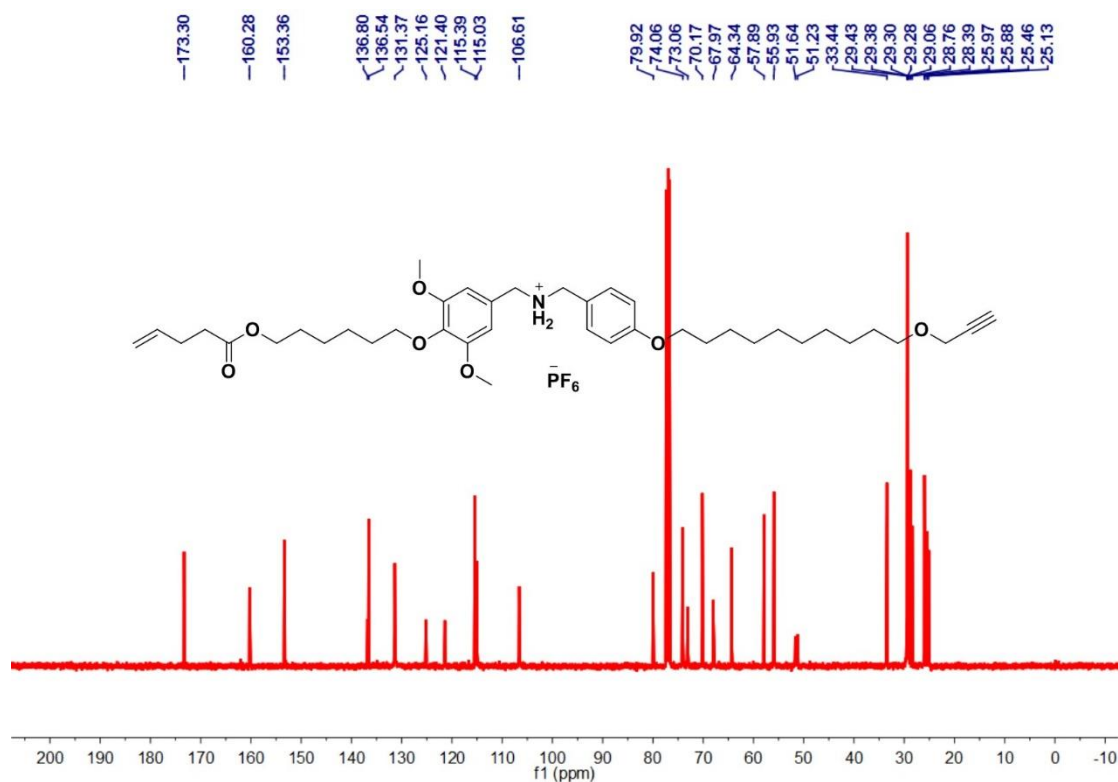

**Figure S11:**  $^{13}\text{C}$  NMR spectrum of compound **5** (100 MHz,  $\text{CDCl}_3$ , 298 K).

#### Single Mass Analysis

Tolerance = 30.0 PPM / DBE: min = -1.5, max = 100.0

Element prediction: Off

Number of isotope peaks used for i-FIT = 2

Monoisotopic Mass, Even Electron Ions

12 formula(e) evaluated with 1 results within limits (up to 1 best isotopic matches for each mass)

Elements Used:

C: 0-40 H: 0-60 N: 0-1 O: 0-7

DH-QU

QDH-ZXL-24 47 (0.676) Cm (46:48)

ECUST Institute of Fine Chem

$[\text{M}-\text{PF}_6]^+$

09-Jan-2018

19:52:16

1: TOF MS ES+

3.43e+003

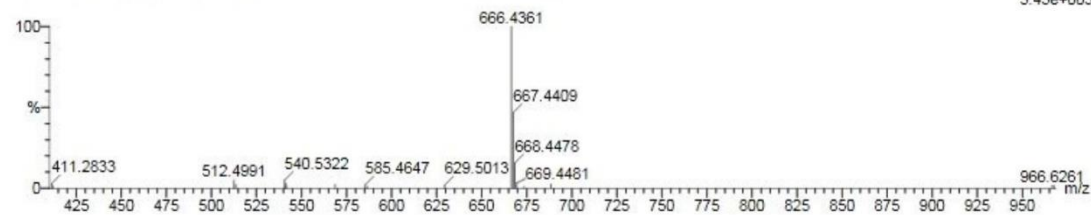

Minimum:

Maximum:

30.0

30.0

-1.5

100.0

Mass

Calc. Mass

mDa

PPM

DBE

i-FIT

i-FIT (Norm)

Formula

666.4361

666.4370

-0.9

-1.4

11.5

8.2

0.0

$\text{C}_{40}\text{H}_{60}\text{N}_7\text{O}_7$

**Figure S12:** HRESI mass spectrum of compound **5**.



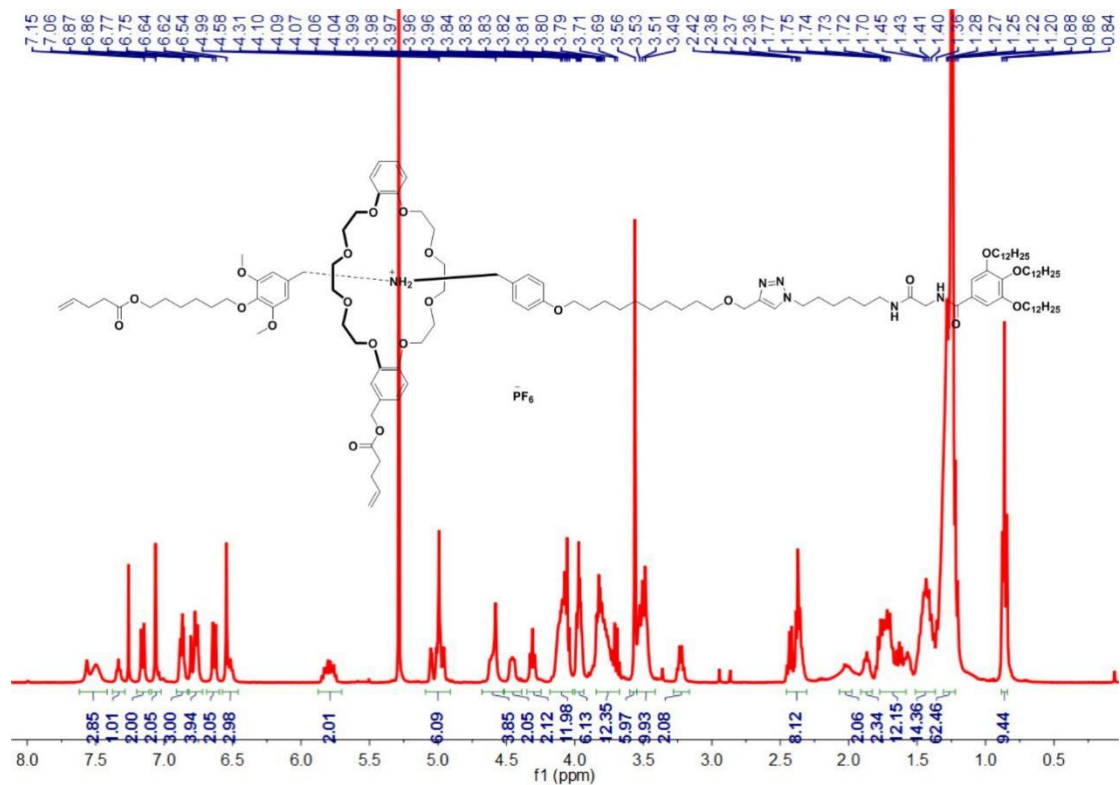

**Figure S13:**  $^1\text{H}$  NMR spectrum of [2]rotaxane **R1** (400 MHz,  $\text{CDCl}_3$ , 298 K).

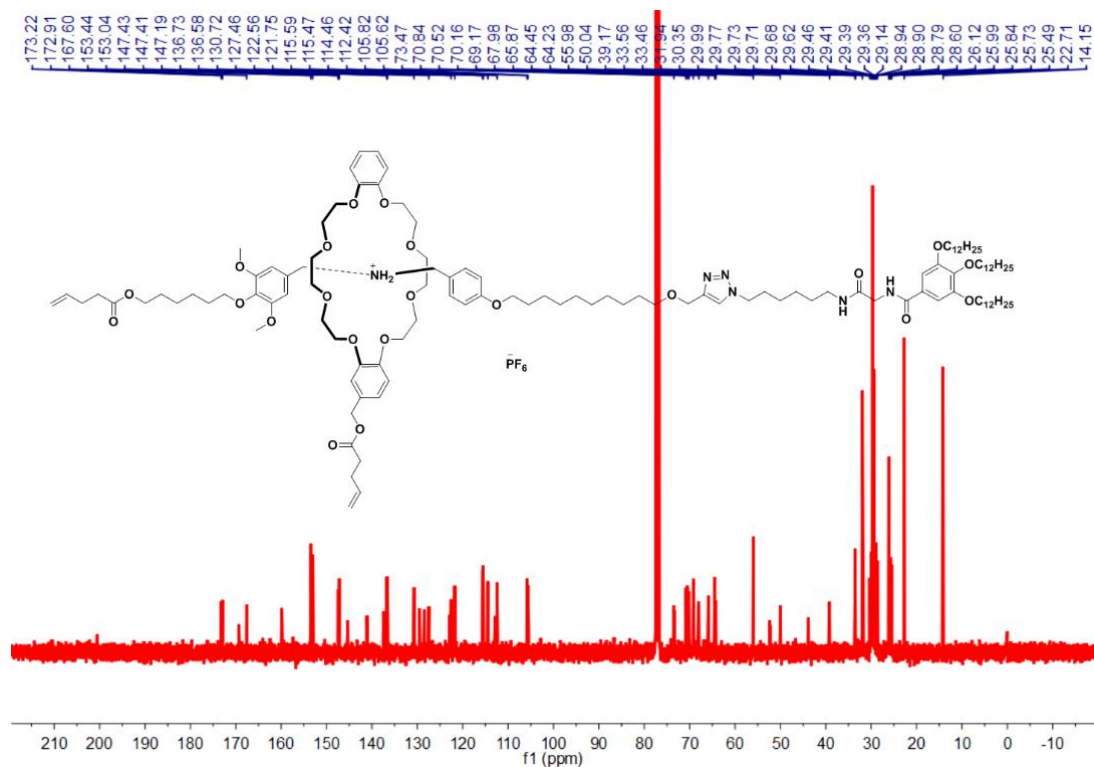

**Figure S14:**  $^{13}\text{C}$  NMR spectrum of [2]rotaxane **R1** (100 MHz,  $\text{CDCl}_3$ , 298 K).



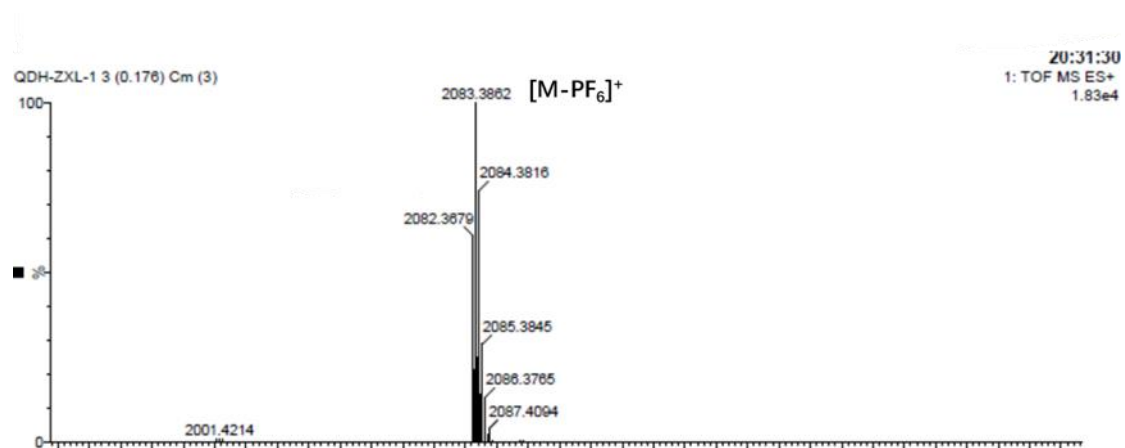

**Figure S15:** HRESI mass spectrum of [2]rotaxane R1.
